# Supplementary material for: BUBR1 recruits PP2A via the B56 family of targeting subunits to promote chromosome congression
Source: PubMed Central journal article supplement — Biol Open. 2013 Mar 25;2(5):479–86. doi: 10.1242/bio.20134051 (PMC3654266; doi:10.1242/bio.20134051), 2013-03-25
Supplement: supp_bio.20134051_bio.20134051-s1.pdf [file supp_bio.20134051_bio.20134051-s1.pdf]

**Supplementary Material**

Peng Xu et al. doi: 10.1242/bio.20134051

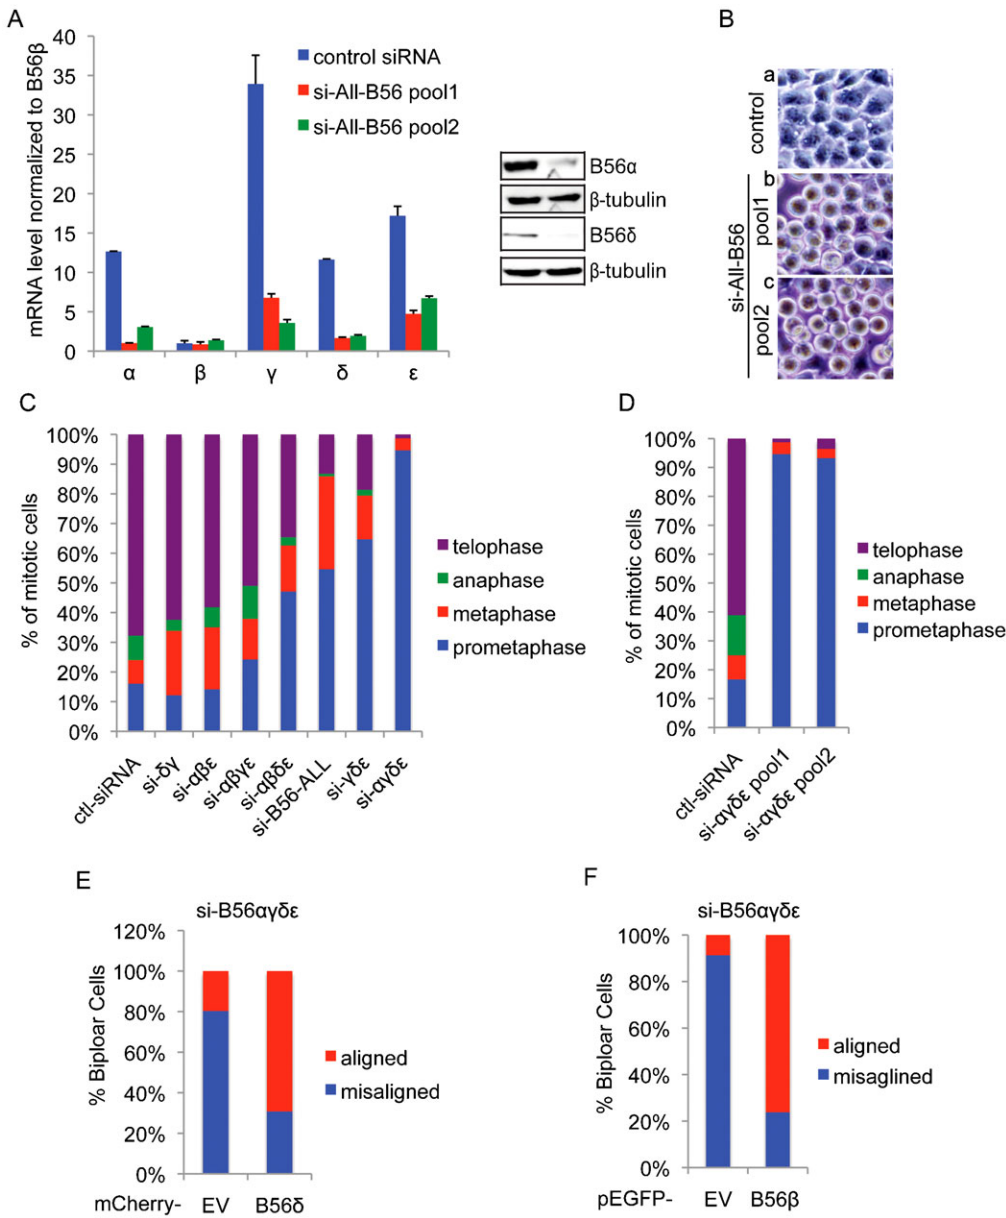

Fig. S1.

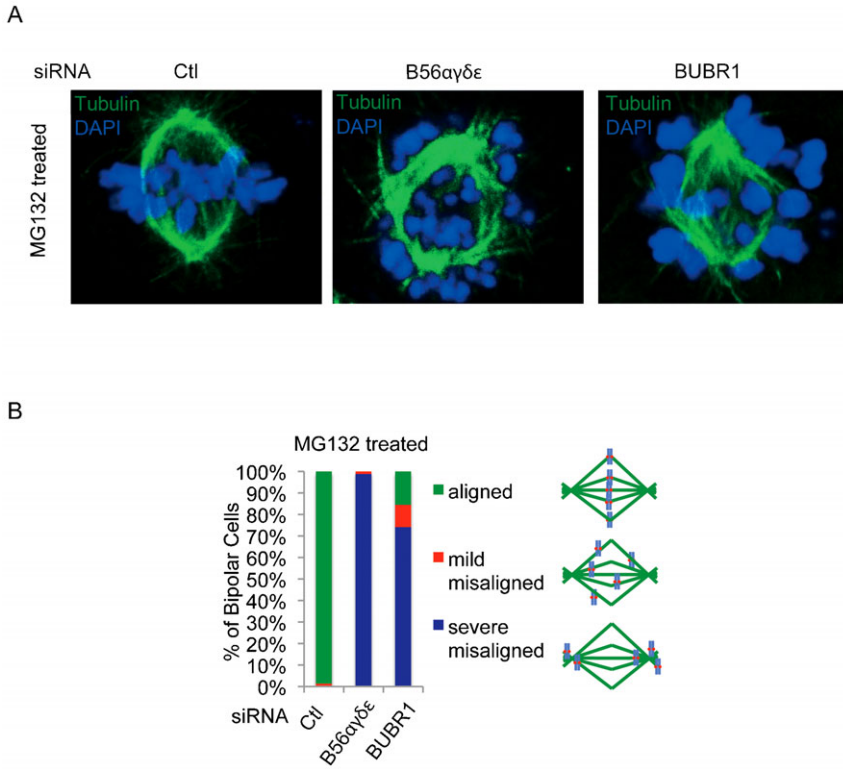

Fig. S2.

*H. Sapiens* 630-D-LPSPERLLP-640  
*P. troglodytes* D-LPSPERLLP  
*M. mulatta* N-LPSPERLLQ  
*B. taurus* D-LPSPERLLQ  
*C. lupus* D-LPSPERLLQ  
*R. norvegicus* S-IAADPEGLLQ  
*M. musculus* G-IAADPEGLLQ  
*G. gallus* IPAPAYSQSVLK  
 . : . : \*

Fig. S3.
